# Supplementary material for: Radiomics MRI Phenotyping with Machine Learning to Predict the Grade of Lower-Grade Gliomas: A Study Focused on Nonenhancing Tumors
Source: PubMed Central journal article supplement — Korean J Radiol. 2019 Aug 23;20(9):1381–9. doi: 10.3348/kjr.2018.0814 (PMC6715562; doi:10.3348/kjr.2018.0814), 2019-08-23
Supplement: kjr-20-1381-s001.pdf [file kjr-20-1381-s001.pdf]

**Supplementary Table 1. MRI Scanners for TCGA Cohort Acquired in 5 Institutions**

| Institutions                                    | No. of Contributed Data | TCGA ID | Scanner (T)                                                                             |
|-------------------------------------------------|-------------------------|---------|-----------------------------------------------------------------------------------------|
| St. Joseph Hospital/Medical Center, Phoenix, AZ | 98                      | TCGA-HT | GE (1.5, 3): Signa Excite, Signa HDx, Signa HDxt<br>Hitachi (1.5): Oasis                |
| Henry Ford Hospital, Detroit, MI                | 57                      | TCGA-DU | GE (1.5, 3): Genesis, Signa Excite, Signa HDxt<br>Philips (1.5, 3): Intera, Ingenia     |
| Case Western Reserve University, Cleveland, OH  | 22                      | TCGA-FG | Siemens (1.5, 3): Avanto, Symphony, Skyra, Verio<br>GE (1.5): Genesis Signa, Signa HDxt |
| Thomas Jefferson University, Philadelphia, PA   | 20                      | TCGA-CS | Philips (1.5, 3): Achieva<br>Siemens (1.5): MAGNETOM Vision                             |
| University of North Carolina, Chapel Hill, NC   | 2                       | TCGA-EZ | Siemens (3): TrioTim                                                                    |

TCGA = The Cancer Genome Atlas
