# Supplementary material for: Radiomics MRI Phenotyping with Machine Learning to Predict the Grade of Lower-Grade Gliomas: A Study Focused on Nonenhancing Tumors
Source: PubMed Central journal article supplement — Korean J Radiol. 2019 Aug 23;20(9):1381–9. doi: 10.3348/kjr.2018.0814 (PMC6715562; doi:10.3348/kjr.2018.0814), 2019-08-23
Supplement: kjr-20-1381-s002.pdf [file kjr-20-1381-s002.pdf]

**Supplementary Table 2. List of Radiomic Features Used in Machine Learning Classifiers**

| Feature Category                | Feature List                                                                                                                                                                                                                                                                                                                                                                                                                                                                                                                |
|---------------------------------|-----------------------------------------------------------------------------------------------------------------------------------------------------------------------------------------------------------------------------------------------------------------------------------------------------------------------------------------------------------------------------------------------------------------------------------------------------------------------------------------------------------------------------|
| Shape (n = 16)                  | Volume, surface area, surface area to volume ratio, sphericity, compactness 1, compactness 2, spherical disproportion, maximum 3D diameter, maximum 2D diameter (column), maximum 2D diameter (row), major axis, minor axis, elongation, flatness                                                                                                                                                                                                                                                                           |
| First-order statistics (n = 19) | Energy, total energy, entropy, minimum, 10th percentile, 90th percentile, maximum, mean, median, interquartile range, range, mean absolute deviation, robust mean absolute deviation, root mean squared, standard deviation, skewness, kurtosis, variance, uniformity                                                                                                                                                                                                                                                       |
| GLCM (n = 27)                   | Autocorrelation, joint average, cluster prominence, cluster shade, cluster tendency, contrast, correlation, difference average, difference entropy, difference variance, joint energy, joint entropy, homogeneity 1, homogeneity 2, informal measure of correlation 1, informal measure of correlation 2, inverse difference moment, inverse difference moment normalized, inverse difference, inverse difference normalized, inverse variance, maximum probability, sum average, sum entropy, sum variance, sum of squares |
| GLRLM (n = 16)                  | Short-run emphasis, long-run emphasis, gray level non-uniformity, gray level non-uniformity normalized, run-length non-uniformity, run-length non-uniformity normalized, run percentage, gray level variance, run variance, run entropy, low gray level run emphasis, high gray level run emphasis, short-run low gray level emphasis, short-run high gray level emphasis, long-run low gray level emphasis, long-run high-gray level emphasis                                                                              |
| GLSZM (n = 16)                  | Small area emphasis, large area emphasis, gray level non-uniformity, gray level non-uniformity normalized, size-zone non-uniformity, size-zone non-uniformity normalized, zone percentage, gray level variance, zone variance, zone entropy, low gray level zone emphasis, high gray level zone emphasis, small area low gray level emphasis, small area high gray level emphasis, large area low gray level emphasis, large area high gray level emphasis                                                                  |

Details of feature calculation are described at Pyradiomics site (<https://pyradiomics.readthedocs.io/en/latest/features.html>). GLCM = gray level co-occurrence matrix, GLRLM = gray level run-length matrix, GLSZM = gray level size zone matrix, 2D = two-dimensional, 3D = three-dimensional
